# Supplementary material for: Mesoporous Pd@Pt core–shell nanoparticles supported on multi-walled carbon nanotubes as a sensing platform: application in simultaneous electrochemical detection of anticancer drugs doxorubicin and dasatinib
Source: Royal Society of Chemistry journal article supplement (doi:10.1039/c8ay02381f), 2018-12-11
Supplement: c8ay02381f1.pdf [file c8ay02381f1.pdf]

## Electronic Supplementary Information

**Mesoporous Pd@Pt core-shell nanoparticles supported on multi-walled carbon nanotubes as a sensing platform: Application to simultaneous electrochemical detection of anticancer drugs doxorubicin and dasatinib**

**Pramod K. Kalambate, Yankai Li, Yue Shen, Yunhui Huang\***

State Key Laboratory of Materials Processing and Die & Mould Technology, School of Materials Science and Engineering, Huazhong University of Science and Technology, Wuhan, Hubei 430074, P. R. China

**\*Corresponding author:**

E-mail: [huangyh@mail.hust.edu.cn](mailto:huangyh@mail.hust.edu.cn)

Tel: 86-027-87558237; Fax: 86-027-87558241

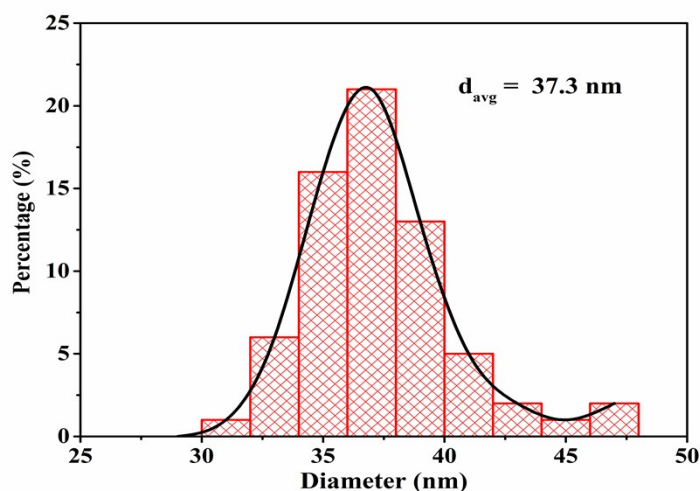

**Fig. S1** Particle size distribution histogram obtained from TEM analysis

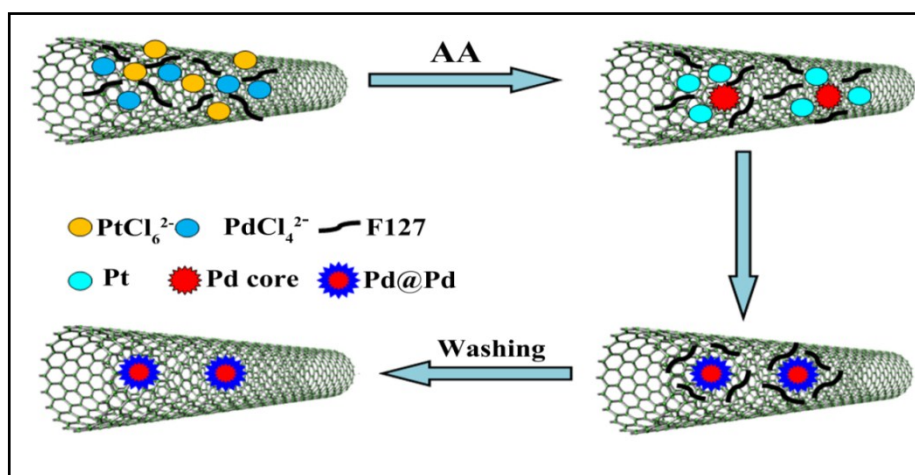

**Fig. S2** The stepwise synthesis of Pd@Pt/MWCNT

### 1. Formation mechanism of Pd@Pt

The formation mechanism of Pd@Pt is illustrated in Fig. S2. The standard reduction potential of Pt ions [PtCl<sub>6</sub>]<sup>2-</sup>/Pt (0.76 V vs. SHE) is more positive than Pd ions [PdCl<sub>4</sub>]<sup>2-</sup> (0.59V vs. SHE). So with this principle Pt precursor is expected to reduce first than Pd precursor and therefore the formation of Pd@Pt core-shell structure is unexpected. However, the only reason behind formation of Pd@Pt structure can be explained on the basis of difference in reduction rates of two metals (Pd reduction rate > Pt reduction rate). Such unusual behaviour is observed in previous studies for simultaneous reduction of Pd and Pt [1, 2]. Therefore, Pd precursor is reduced first by ascorbic acid forming a Pd seeds and then formation of Pt

nanoparticles on Pd forming a core-shell structure. During this process, F127 molecules are adsorbed on Pd seeds and act as a stabilizing agent. In the present case, the concentration of surfactant is over critical micelle concentration (CMC) forming the spherical micelles. During the growth of Pt on Pd seeds, F127 micelles interact with Pd seeds and acts as structure director forming Pd@Pt core-shell mesoporous structure

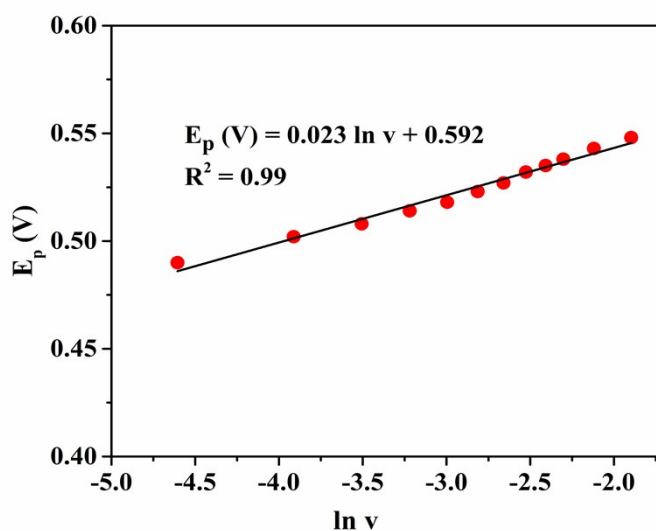

**Fig. S3** Plot of  $E_p$  vs.  $\ln v$  obtained from scan rate ( $V s^{-1}$ ) of doxorubicin

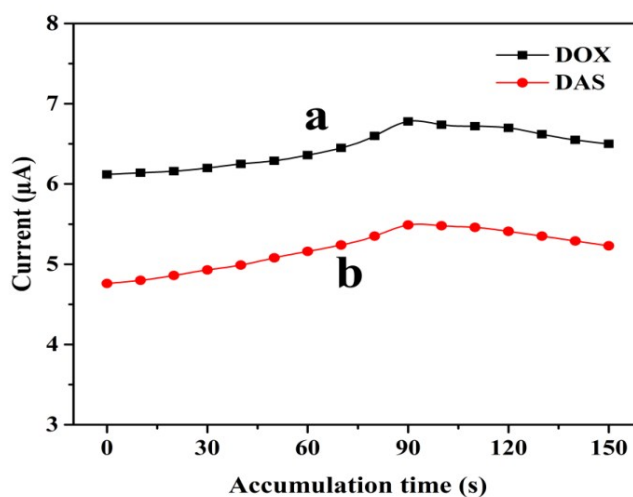

**Fig. S4** Effect of accumulation time ( $t_{acc}$ ) on peak current of (a)  $2.4 \mu M$  DOX and (b)  $3.0 \mu M$  DAS

## 2. Optimization of SWV parameters

The effect of accumulation time ( $t_{acc}$ ) on peak currents of 2.4  $\mu\text{M}$  DOX and 3.0  $\mu\text{M}$  DAS was carefully studied in PBS (0.1M, pH 6.0) through SWV. The optimization was carried out in such a way that one parameter was changed while others were kept constant. Firstly, OCP was considered as  $E_{acc}$  at which maximum current response was obtained. Secondly, the effect of  $t_{acc}$  on peak currents was investigated in the range 0-150 s at OCP. As can be seen in Fig. S4 that with increase of the  $t_{acc}$  the peak currents increases up to 90 s and decreases afterwards may be due to the saturation at the electrode surface. Besides this, other operating parameters such as frequency ( $f$ ), pulse amplitude ( $a$ ) and scan increment ( $\Delta E_s$ ) were also explored in order to get maximum analytical signal and better peak separation. Hence, sensitive determination of DOX and DAS was performed by AdSSWV at  $E_{acc} = \text{OCP}$ ,  $t_{acc} = 90$  s,  $f = 5$  Hz,  $a = 30$  mV,  $\Delta E_s = 4$  mV and equilibrium time = 10 s.

### Tables

**Table S1** Analytical parameters for electrochemical determination of DOX and DAS in PBS (0.1 M, pH 6.0)

| No.                                                                                              | Molecule | LWR (nM)  | LRE                                                  | R <sup>2</sup> | LOD (nM) |
|--------------------------------------------------------------------------------------------------|----------|-----------|------------------------------------------------------|----------------|----------|
| (A) Statistical data for individual molecules                                                    |          |           |                                                      |                |          |
| 1                                                                                                | DOX      | 3.8-8410  | $I_p(\mu\text{A})=0.021C(10^{-8}\text{M}) + 1.451$   | 0.993          | 0.73     |
| 2                                                                                                | DAS      | 37-9720   | $I_p(\mu\text{A})= 0.015 C(10^{-8}\text{M}) + 1.128$ | 0.993          | 5.83     |
| (B) Statistical data for DOX when the concentration of DAS is kept constant (4.1 $\mu\text{M}$ ) |          |           |                                                      |                |          |
| 3                                                                                                | DOX      | 4.2-8520  | $I_p(\mu\text{A})= 0.02 C(10^{-8}\text{M}) + 1.506$  | 0.991          | 0.8      |
| (C) Statistical data for DAS when the concentration of DOX is kept constant (2.4 $\mu\text{M}$ ) |          |           |                                                      |                |          |
| 4                                                                                                | DAS      | 37.5-9820 | $I_p(\mu\text{A})= 0.014 C(10^{-8}\text{M}) + 1.222$ | 0.992          | 6.25     |
| (D) Statistical data for DOX and DAS simultaneously                                              |          |           |                                                      |                |          |
| 5                                                                                                | DOX      | 4.4-8580  | $I_p(\mu\text{A})=0.019 C(10^{-8}\text{M}) + 1.501$  | 0.991          | 0.86     |
|                                                                                                  | DAS      | 38-9880   | $I_p(\mu\text{A})=0.013 C(10^{-8}\text{M}) + 1.228$  | 0.991          | 6.72     |

**Table S2** Comparison of the proposed sensor with literature for the electrochemical determination of DOX and DAS

| Molecule | Sensor                                      | Technique | LOD                                  | Analytical Range                | References |
|----------|---------------------------------------------|-----------|--------------------------------------|---------------------------------|------------|
| DOX      | GQD                                         | CV        | 0.016 $\mu\text{M}$                  | 0.018~3.60 $\mu\text{M}$        | [3]        |
|          | OMWCNT                                      | CV        | $9.4 \times 10^{-3} \mu\text{M}$     | 0.04~90 $\mu\text{M}$           | [4]        |
|          | MWCNT/CoFe <sub>2</sub> O <sub>4</sub> /CPE | CV        | 10 pM                                | 0.05~1150 nM                    | [5]        |
|          | Mg <sub>2</sub> Al-CI-LDHs                  | CV        | 0.02 nM                              | 10.0~2110.0 nM                  | [6]        |
|          | Hg(Ag)FE                                    | SWV       | 9.89 ng mL <sup>-1</sup>             | 4.99~59.64 ng mL <sup>-1</sup>  | [7]        |
|          | MAb/GNP/TB Sol-Gel                          | CV        | 0.09 pg mL <sup>-1</sup>             | 2.5~50.0 pg mL <sup>-1</sup>    | [8]        |
|          | MWNT-COOH                                   | CV        | 10 ngmL <sup>-1</sup>                | 0.02~1.28 $\mu\text{g mL}^{-1}$ | [9]        |
|          | GNP/RGD-MAP-C                               | CV        | 0.01 $\mu\text{g/mL}$                | 0.5~1.0 $\mu\text{g/mL}$        | [10]       |
|          | GNPs/HDT                                    | CV        | $1.74 \times 10^{-11} \text{M}^{-1}$ | 1.0 ~160.0 pg mL <sup>-1</sup>  | [11]       |
|          | ds-DNA/Au                                   | CV        | 1 pM                                 | 0.08~0.5 M                      | [12]       |
|          | Ferrofluid                                  | CV        | —                                    | 0.05~0.5 mgmL <sup>-1</sup>     | [13]       |
|          | AgNPs-CDs-rGO/GCE                           | DPV       | 2 nM                                 | 0.01~2.5 $\mu\text{M}$          | [14]       |
|          | ZnO/BMTFB/CPE                               | SWV       | 9 nM                                 | 0.07~500 $\mu\text{M}$          | [15]       |
|          | Pd@Pt/MWCNT                                 | AdSSWV    | 0.86 nM                              | 4.4-8580 nM                     | This work# |
|          | Pd@Pt/MWCNT                                 | AdSSWV    | 0.73 nM                              | 3.8-8410 nM                     | This work* |
| DAS      | GCE                                         | DPV       | 0.13 $\mu\text{M}$                   | 0.20 - 2.00 $\mu\text{M}$       | [16]       |
|          | Pt/MWCNTs- BMIHFP                           | SWV       | 1.0 $\mu\text{M}$                    | 5.0-500 $\mu\text{M}$           | [17]       |
|          | ZnO/BMTFB/CPE                               | SWV       | 0.5 $\mu\text{M}$                    | 1.0~1200 $\mu\text{M}$          | [15]       |
|          | Pd@Pt/MWCNT                                 | AdSSWV    | 6.72 nM                              | 38-9880 nM                      | This work# |
|          | Pd@Pt/MWCNT                                 | AdSSWV    | 5.83 nM                              | 37-9720 nM                      | This work* |

#: Simultaneous determination; \*: Individual determination

**Abbreviations:** graphene quantum dots (GQD); oxidized multiwalled carbon nanotube (OMWCNT); magnetic graphene oxide grafted with chlorosulfonic acid (Fe<sub>3</sub>O<sub>4</sub>-GO-SO<sub>3</sub>H); spinel-structured cobalt ferrite (CoFe<sub>2</sub>O<sub>4</sub>); carbon paste electrode (CPE); layered double hydroxides (LDHs); silver amalgam film electrode (Hg(Ag)FE); gold nanoparticles (GNPs); thiol base sol-gel (TBSol-Gel); carboxylated multiwalled carbon nanotubes (MWNT-COOH); glycine-aspartic acid (RGD); 1,6-hexanedithiol (HDT); double-stranded DNA (ds-DNA); magnetic nanoparticle colloidal suspension (Ferrofluid); 1-butyl-3-methylimidazolium hexafluoro phosphate (BMIHFP); carbon dots (CDs); 1-butyl-3-methylimidazolium tetrafluoroborate (BMTFB)

**Table S3** Precision and Bias of assay for DOX and DAS by the proposed voltammetric procedure (n = 5)

| Molecule | Concentration (taken) ( $10^{-7}$ M) | Concentration (found) ( $10^{-7}$ M) | Recovery (%) (n = 5) | Bias (%) | Precision % RSD (n = 5) |
|----------|--------------------------------------|--------------------------------------|----------------------|----------|-------------------------|
| DOX      | Intra - day                          |                                      |                      |          |                         |
|          | 1.19                                 | 1.175                                | 98.7                 | 1.3      | 1.98                    |
| DAS      | Inter - day                          |                                      |                      |          |                         |
|          | 2.38                                 | 2.34                                 | 98.3                 | 1.7      | 2.24                    |
|          | Intra - day                          |                                      |                      |          |                         |
|          | 1.33                                 | 1.31                                 | 98.5                 | 1.5      | 1.96                    |
|          | Inter - day                          |                                      |                      |          |                         |
|          | 2.26                                 | 2.22                                 | 98.2                 | 1.8      | 2.16                    |

**Table S4** Recovery studies for individual determination of DOX and DAS in urine and blood serum samples (n=5)

| Sample         | Drug | Spiked ( $10^{-7}$ M) | Detected ( $10^{-7}$ M) | Recovery (%) $\pm$ % RSD |
|----------------|------|-----------------------|-------------------------|--------------------------|
| Urine Sample 1 | DOX  | Not spiked            | Not found               | ---                      |
|                |      | 0.42                  | 0.414                   | 98.57 $\pm$ 1.89         |
|                |      | 0.76                  | 0.75                    | 98.68 $\pm$ 1.96         |
|                |      | 1.28                  | 1.272                   | 99.37 $\pm$ 1.98         |
| Urine Sample 2 | DAS  | Not spiked            | Not found               | ---                      |
|                |      | 0.47                  | 0.47                    | 100.0 $\pm$ 1.93         |
|                |      | 0.72                  | 0.714                   | 99.17 $\pm$ 1.95         |
|                |      | 1.18                  | 1.17                    | 99.15 $\pm$ 1.98         |
| Serum Sample 1 | DOX  | Not spiked            | Not found               | ---                      |
|                |      | 0.35                  | 0.345                   | 98.57 $\pm$ 1.90         |
|                |      | 0.77                  | 0.765                   | 99.35 $\pm$ 2.06         |
|                |      | 1.32                  | 1.32                    | 100.0 $\pm$ 1.98         |
| Serum Sample 2 | DAS  | Not spiked            | Not found               | ---                      |
|                |      | 0.38                  | 0.376                   | 98.94 $\pm$ 2.04         |
|                |      | 0.65                  | 0.651                   | 100.15 $\pm$ 2.11        |
|                |      | 1.12                  | 1.12                    | 100.00 $\pm$ 2.08        |

## References

- [1] L. Wang, Y. Nemoto and Y. Yamauchi, *J. Am. Chem. Soc.*, 2011, **133**, 9674-9677.
- [2] L. Wang and Y. Yamauchi, *J. Am. Chem. Soc.*, 2010, **132**, 13636-13638.
- [3] M. Hasanzadeh, N. Hashemzadeh, N. Shadjou, J. Eivazi-Ziaei, M. K. Jafari and A. Jouyban, *J. Mol. Liq.*, 2016, **221**, 354-357.
- [4] E. Haghshenas, T. Madrakian and A. Afkhami, *Anal. Bioanal. Chem.*, 2016, **408**, 2577-2586.
- [5] M. Taei, F. Hasanpour, H. Salavati and S. Mohammadian, *Microchim Acta*, 2016, **183**, 49-56.
- [6] M. Taei, F. Hasanpour and E. Dehghani, *J. Taiwan Inst. Chem. Eng.*, 2015, **54**, 183-190.
- [7] O. Vajdle, J. Zbiljic, B. Tasic, D. Jovic, V. Guzsvany and A. Djordjevic, *Electrochim. Acta*, 2014, **132**, 49-57.
- [8] B. Rezaei, N. Askarpour and A. A. Ensafi, *Talanta*, 2014, **119**, 164-169.
- [9] S. Wang, Z. Huang, M. Liu and H. Ding, *Sens. Lett.* 2012, **10**, 117-121.
- [10] T. H. Kim, W. A. El-Said, J. H. An and J. W. Choi, *Nanomedicine*, 2013, **9**, 336-344.
- [11] P. F. Rezaei, S. Fouladdel, S. Cristofanon, S. M. Ghaffari, G. R. Amin and E. Azizi *Cytotechnology*, 2011, **63**, 503-512.
- [12] B. P. Ting, J. Zhang, Z. Gao and J. Y. Ying, *Biosens Bioelectron*, 2009, **25**, 282-287.
- [13] M. Brzozowska, P. Kryszynski, *Electrochim. Acta*, 2009, **54**, 5065-5070.
- [14] H. Guo, H. Jin, R. Gui, Z. Wang, J. Xia and F. Zhang, *Sens. Actuators, B*, 2017, **253**, 50-57.
- [15] S. A. R. Alavi-Tabari, M. A. Khalilzadeh, H. Karimi-Maleh, *J. Electroanal. Chem.*, 2018, **811**, 84-88.
- [16] C. S. H. Jesus and V. C. Diculescu, *J. Electroanal. Chem.*, 2015, **752**, 47-53.

[17] H. Karimi-Maleh, A. F. Shojaei, K. Tabatabaeian, F. Karimi, S. Shakeri and R. Moradi, *Biosens. Bioelectron.*, 2016, **86**, 879–884.
